# Supplementary material
Source: PubMed Central journal article supplement (PMC3911500)
Supplement: MCB.01225-13_zmb999100292so2.pdf [file MCB.01225-13_zmb999100292so2.pdf]

**Supplemental Table S2: The NF- $\kappa$ B-dependent upregulated and downregulated genes induced by TLR4 stimulation in Control or S6K1<sup>KD</sup> THP-1 cells**

| GENE     | Cont. THP-1+LPS<br>(3h) | Cont. THP-1+LPS<br>(9h) | S6K1 <sup>KD</sup> THP-1+LPS<br>(3h) | S6K1 <sup>KD</sup> THP-1+LPS<br>(9h) | S6K1 <sup>KD</sup> THP-1 | S6K1 <sup>KD</sup> THP-1+LPS<br>(3h) | S6K1 <sup>KD</sup> THP-1+LPS (9h) |
|----------|-------------------------|-------------------------|--------------------------------------|--------------------------------------|--------------------------|--------------------------------------|-----------------------------------|
| SYMBOL   | / Cont. THP-1           | / Cont. THP-1           | / S6K1 <sup>KD</sup> THP-1           | / S6K1 <sup>KD</sup> THP-1           | / Cont. THP-1            | / Cont. THP-1+LPS<br>(3h)            | / Cont. THP-1+LPS (9h)            |
| IL1B     | 119.794552              | 119.215339              | 131.116122                           | 125.067009                           | 1.426978                 | 1.561839                             | 1.497021                          |
| SERPINE2 | 31.792586               | 22.026695               | 41.067131                            | 32.595035                            | 1.877083                 | 2.424667                             | 2.777702                          |
| IL8      | 21.840023               | 17.087304               | 37.850539                            | 41.34438                             | 1.332462                 | 2.309264                             | 3.224019                          |
| BCL3     | 13.82639                | 11.179045               | 17.502999                            | 14.392787                            | 1.397593                 | 1.769231                             | 1.799372                          |
| CCL3     | 15.365627               | 10.437625               | 28.839832                            | 13.71682                             | 1.026024                 | 1.925751                             | 1.348371                          |
| IER3     | 13.553511               | 9.171791                | 30.215582                            | 32.274776                            | 1.175878                 | 2.621449                             | 4.137819                          |
| CD44     | 10.123538               | 9.157923                | 5.86209                              | 5.977561                             | 1.977421                 | 1.145037                             | 1.290703                          |
| NFKBIZ   | 9.626982                | 9.024501                | 16.33122                             | 11.207953                            | 1.29173                  | 2.191291                             | 1.60426                           |
| CDKN1A   | 2.665988                | 8.034879                | 6.937796                             | 9.666161                             | 1.581204                 | 4.114824                             | 1.902228                          |
| MX1      | 1.318458                | 7.799047                | 5.221921                             | 37.697241                            | 1.425257                 | 5.644912                             | 6.889079                          |
| CCL20    | 41.066797               | 6.535827                | 85.513183                            | 15.146832                            | 1.063973                 | 2.215505                             | 2.465766                          |
| THBS1    | 5.29649                 | 5.901499                | 80.588778                            | 131.170483                           | -1.058695                | 14.371951                            | 20.994384                         |
| CD40     | 6.47215                 | 5.367354                | 7.016627                             | 8.697393                             | 1.00249                  | 1.086825                             | 1.624459                          |
| ICAM1    | 7.246345                | 5.279595                | 14.006649                            | 9.526373                             | -1.03258                 | 1.871938                             | 1.747443                          |
| FTH1     | 4.573597                | 4.718132                | 5.056265                             | 7.188218                             | 1.178783                 | 1.303184                             | 1.795912                          |
| NFKB2    | 8.211824                | 3.96705                 | 10.249105                            | 6.576939                             | 1.039543                 | 1.297444                             | 1.723449                          |
| ADORA2A  | 10.490066               | 3.621856                | 10.474706                            | 6.544334                             | -1.002963                | -1.004434                            | 1.801562                          |
| SDC4     | 10.713859               | 3.593526                | 7.465475                             | 2.474992                             | 1.617949                 | 1.127396                             | 1.11434                           |

|          |           |          |           |           |           |          |          |
|----------|-----------|----------|-----------|-----------|-----------|----------|----------|
| IL1A     | 3.433182  | 3.32871  | 5.138378  | 6.292233  | 1.160577  | 1.737013 | 2.193829 |
| NFKB1    | 6.876927  | 3.247491 | 6.627871  | 4.439757  | 1.156494  | 1.114611 | 1.581083 |
| SAT1     | 3.660532  | 2.946678 | 8.296843  | 8.692451  | 1.257219  | 2.849571 | 3.70869  |
| HMOX1    | 2.065637  | 2.939582 | 3.340501  | 7.110374  | 1.275778  | 2.063159 | 3.085901 |
| ABCA1    | -1.101872 | 2.803823 | 1.631119  | 8.232876  | -1.3667   | 1.315053 | 2.148461 |
| IL1RN    | 1.805179  | 2.699124 | 6.638828  | 4.11807   | 1.271206  | 4.675056 | 1.939486 |
| OLR1     | 6.525805  | 2.629029 | 8.796478  | 6.477608  | 1.278846  | 1.723825 | 3.150922 |
| IRF7     | 1.304892  | 2.624661 | 2.966749  | 8.516269  | -1.460369 | 1.556838 | 2.221844 |
| TNFRSF1B | -1.765524 | 2.601299 | 1.843193  | 4.42457   | -1.20312  | 2.704801 | 1.413747 |
| CCL2     | 1.134289  | 2.486228 | 1.399378  | 9.014566  | -1.159797 | 1.063725 | 3.126237 |
| STAT5A   | 16.674569 | 2.445951 | 11.864628 | 3.215187  | 1.143002  | -1.22957 | 1.502469 |
| IFI44L   | 1.191463  | 2.337183 | 1.491058  | 12.279423 | 1.053704  | 1.31866  | 5.5361   |
| TNFRSF21 | -1.260308 | 2.312491 | 1.112727  | 3.257841  | 1.904507  | 2.670839 | 2.683072 |
| CCND1    | 1.622644  | 2.124497 | 1.639895  | 2.276415  | 1.59608   | 1.613048 | 1.710211 |
| PLAU     | 2.857024  | 2.02696  | 5.018368  | 5.611023  | 1.125119  | 1.976275 | 3.114552 |
| CFB      | 2.088193  | 1.935822 | 2.357096  | 2.673444  | 1.252128  | 1.413368 | 1.729236 |
| PTGS2    | 3.989896  | 1.769718 | 19.577515 | 5.228783  | 1.317972  | 6.466988 | 3.89406  |
| TRAF1    | 3.355521  | 1.721135 | 3.966007  | 2.762667  | 1.013945  | 1.198417 | 1.627526 |
| TNFRSF4  | 3.127695  | 1.554709 | 5.340006  | 3.359929  | -1.006807 | 1.695786 | 2.14652  |
| TNIP3    | 2.207407  | 1.372033 | 10.471084 | 3.581439  | 1.022706  | 4.85132  | 2.669584 |

---

; Un-regulated or down-regulated (represented as “-“) NF- $\kappa$ B-dependent genes in each comparison (*column 1*: Control THP-1 cells treated with LPS for 3h *versus* Control THP-1 cells; *column 2*, Control THP-1 cells treated with LPS for 9h *versus* Control THP-1 cells; *column 3*, S6K1<sup>KD</sup> THP-1 cells treated with LPS for 3h

*versus* S6K1<sup>KD</sup> THP-1 cells; column 4, S6K1<sup>KD</sup> THP-1 cells treated with LPS for 9h *versus* S6K1<sup>KD</sup> THP-1 cells; column 5, S6K1<sup>KD</sup> THP-1 cells *versus* Control THP-1 cells; column 6, S6K1<sup>KD</sup> THP-1 cells treated with LPS for 3h *versus* Control THP-1 cells treated with LPS for 3h; column 7, S6K1<sup>KD</sup> THP-1 cells treated with LPS for 9h *versus* Control THP-1 cells treated with LPS for 9h cells) were represented. These results were derived from the microarray results represented in supplemental Table S1.
