# Supplementary material
Source: PubMed Central journal article supplement (PMC3911500)
Supplement: MCB.01225-13_zmb999100292so3.pdf [file MCB.01225-13_zmb999100292so3.pdf]

**Supplemental Table S3: The NF- $\kappa$ B-dependent upregulated and downregulated genes induced by TLR2 stimulation in Control or S6K1<sup>KD</sup> THP-1 cells**

| GENE     | Cont. THP-1+FSL-1 (3h) | Cont. THP-1+FSL-1 (9h) | S6K1 <sup>KD</sup> THP-1+FSL-1 (3h) | S6K1 <sup>KD</sup> THP-1+FSL-1 (9h) | S6K1 <sup>KD</sup> THP-1 | S6K1 <sup>KD</sup> THP-1+FSL-1 (3h) | S6K1 <sup>KD</sup> THP-1+FSL-1 (9h) |
|----------|------------------------|------------------------|-------------------------------------|-------------------------------------|--------------------------|-------------------------------------|-------------------------------------|
| SYMBOL   | / Cont. THP-1          | / Control THP-1        | / S6K1 <sup>KD</sup> THP-1          | / S6K1 <sup>KD</sup> THP-1          | / Cont. THP-1            | / Cont. THP-1+FSL-1 (3h)            | / Cont. THP-1+FSL-1 (9h)            |
| IL1B     | 71.771983              | 112.864041             | 123.815168                          | 136.539945                          | 1.426978                 | 2.461706                            | 1.726321                            |
| EBI3     | 20.19301               | 42.585226              | 30.813331                           | 57.15326                            | 1.076268                 | 1.642321                            | 1.44445                             |
| IL8      | 26.618996              | 37.195733              | 68.698207                           | 90.865063                           | 1.220226                 | 3.149155                            | 2.980878                            |
| IL23A    | 46.860668              | 17.424751              | 102.989526                          | 72.125236                           | -1.165921                | 1.885017                            | 3.550188                            |
| BCL3     | 12.382951              | 11.335947              | 12.78104                            | 12.199692                           | 1.397593                 | 1.442523                            | 1.504083                            |
| CCL3     | 6.355698               | 10.079213              | 25.272104                           | 26.939863                           | 1.026024                 | 4.079772                            | 2.742373                            |
| NFKBIZ   | 12.527999              | 10.048251              | 13.119532                           | 14.756062                           | 1.29173                  | 1.352721                            | 1.896931                            |
| CD44     | 6.579612               | 9.122604               | 5.007372                            | 6.986539                            | 1.977421                 | 1.504904                            | 1.514407                            |
| IER3     | 12.825101              | 8.211914               | 25.352387                           | 30.161238                           | 1.175878                 | 2.324451                            | 4.31884                             |
| MX1      | 1.178566               | 7.692521               | 4.421448                            | 40.364938                           | 1.425257                 | 5.34692                             | 7.478745                            |
| SERPINE2 | 10.34624               | 6.94915                | 25.129929                           | 17.513325                           | 1.877083                 | 4.559238                            | 4.730646                            |
| CDKN1A   | 1.71084                | 6.74506                | 4.582194                            | 10.193294                           | 1.581204                 | 4.234986                            | 2.389553                            |
| CCL20    | 24.062231              | 5.588197               | 38.842122                           | 14.354322                           | 1.063973                 | 1.717503                            | 2.733012                            |
| THBS1    | 1.880699               | 4.814951               | 21.812771                           | 107.340521                          | -1.058695                | 10.955214                           | 21.057227                           |
| ICAM1    | 4.31196                | 4.466168               | 8.677526                            | 9.005448                            | -1.03258                 | 1.948935                            | 1.952749                            |
| NOD2     | 2.16945                | 4.31648                | 3.765302                            | 4.584007                            | 1.094871                 | 1.900261                            | 1.162729                            |
| NFKB2    | 6.205428               | 4.312532               | 7.454948                            | 6.313083                            | 1.039543                 | 1.248864                            | 1.521779                            |
| FTH1     | 2.968746               | 4.10201                | 5.125631                            | 7.533641                            | 1.178783                 | 2.035205                            | 2.164921                            |

|          |           |          |           |           |           |           |          |
|----------|-----------|----------|-----------|-----------|-----------|-----------|----------|
| ADORA2A  | 4.478044  | 3.877824 | 6.566317  | 6.397175  | -1.002963 | 1.462004  | 1.644808 |
| IL1A     | 2.135938  | 3.231935 | 5.580112  | 6.572064  | 1.160577  | 3.031993  | 2.360006 |
| SDC4     | 6.305618  | 3.167832 | 4.644741  | 2.11199   | 1.617949  | 1.191787  | 1.078685 |
| ABCA1    | 1.706172  | 3.104786 | 1.743638  | 9.424397  | -1.3667   | -1.337334 | 2.221    |
| SAT1     | 3.386524  | 2.852613 | 4.795086  | 8.1846    | 1.257219  | 1.780135  | 3.60716  |
| IL1RN    | 1.491572  | 2.809536 | 4.044538  | 4.652672  | 1.271206  | 3.446994  | 2.105153 |
| HMOX1    | 1.149615  | 2.800913 | 3.078612  | 5.809439  | 1.275778  | 3.416472  | 2.646121 |
| IRF7     | 1.269603  | 2.737905 | 2.512056  | 7.834258  | -1.460369 | 1.354873  | 1.959372 |
| CXCL10   | 22.299281 | 2.73109  | 14.557502 | 3.880482  | 1.075182  | -1.424695 | 1.527677 |
| TNFRSF1B | -1.983021 | 2.619876 | -1.144365 | 5.363807  | -1.20312  | 1.440302  | 1.701701 |
| CCL2     | -1.003977 | 2.492125 | 1.570468  | 10.418874 | -1.159797 | 1.359474  | 3.604699 |
| CCND1    | 1.497234  | 2.353528 | 1.594719  | 2.892832  | 1.59608   | 1.700001  | 1.961817 |
| TNFRSF21 | -1.471127 | 2.2346   | -1.126053 | 2.985286  | 1.904507  | 2.488134  | 2.544302 |
| OLR1     | 3.285107  | 2.112019 | 3.377491  | 3.094931  | 1.278846  | 1.31481   | 1.874008 |
| IFI44L   | 1.01703   | 2.075101 | 1.604673  | 13.917611 | 1.053704  | 1.662538  | 7.067149 |
| PLAU     | 2.516255  | 1.896899 | 3.518388  | 4.755742  | 1.125119  | 1.573213  | 2.820802 |
| PTGS2    | 2.422343  | 1.646235 | 10.400714 | 4.798926  | 1.317972  | 5.65892   | 3.842007 |

---

; Un-regulated or down-regulated (represented as “-“) NF- $\kappa$ B-dependent genes in each comparison (*column 1*: Control THP-1 cells treated with FSL-1 for 3h *versus* Control THP-1 cells; *column 2*, Control THP-1 cells treated with FSL-1 for 9h *versus* Control THP-1 cells; *column 3*, S6K1<sup>KD</sup> THP-1 cells treated with FSL-1 for 3h *versus* S6K1<sup>KD</sup> THP-1 cells; *column 4*, S6K1<sup>KD</sup> THP-1 cells treated with FSL-1 for 9h *versus* S6K1<sup>KD</sup> THP-1 cells; *column 5*, S6K1<sup>KD</sup> THP-1 cells *versus* Control THP-1 cells; *column 6*, S6K1<sup>KD</sup> THP-1 cells treated with FSL-1 for 3h *versus* Control THP-1 cells treated with FSL-1 for 3h; *column 7*, S6K1<sup>KD</sup> THP-1 cells treated with FSL-1 for 9h *versus* Control THP-1 cells treated with FSL-1 for 9h cells) were represented. These results were derived from the microarray results

represented in supplemental Table S1.
